# Supplementary material for: In-Person and Telehealth Ambulatory Contacts and Costs in a Large US Insured Cohort Before and During the COVID-19 Pandemic
Source: PubMed Central journal article supplement (PMC7988360; doi:10.1001/jamanetworkopen.2021.2618), 2021-03-23
Supplement: jamanetwopen-e212618-s001.pdf [file jamanetwopen-e212618-s001.pdf]

## Supplemental Online Content

Weiner JP, Bandeian S, Hatef E, Lans D, Liu A, Lemke KW. In-person and telehealth ambulatory contacts and costs in a large US insured cohort before and during the COVID-19 pandemic. *JAMA Netw Open*. 2021;4(3):e212618. doi:10.1001/jamanetworkopen.2021.2618

**eTable 1.** Assessing the Census Region Distribution of the Study Cohort: Estimated Percentage of Each Region's Under 65 Population Present in This Study's Research Database

**eTable 2.** COVID-19 Cohort Identification Criteria and Study Member Count In the COVID-19 (and Non-COVID) Related Subgroups During the March-June 2020 Study Period

**eTable 3.** A Comprehensive List of Telehealth-Eligible Services and Associated Codes

**eTable 4.** CMS Designated Codes for Place of Service

**eTable 5.** Approach to Designating Telehealth Services (from Among Telehealth Eligible Services) and Type of Modality

**eTable 6.** Study Designated Specialty Using CMS Provider Specialty Codes

**eTable 7.** Comparison of Age and Chronic Condition Counts for Members with 1+ Telehealth vs In-Person Only Visits in 2020: Broken Down by COVID-19 Related Sub-Group Designation

**eFigure 1.** Sample Selection and Subgroup Identification Diagram

**eFigure 2.** Ratio of 2020 to 2019 Ambulatory (AMB) Clinical Encounters by Week, March through June

**eFigure 3.** Telehealth-Eligible Ambulatory (AMB) Encounters per 1000 Enrollees by Week, March-June 2019 and 2020

**eFigure 4.** Adjusted Relative Risk Ratios (RRRs) Associated With Telehealth vs. In-Person Ambulatory Visits During 2020 COVID-19 Period

This supplemental material has been provided by the authors to give readers additional information about their work.

**eTable 1. Assessing the Census Region Distribution of the Study Cohort: Estimated Percentage of Each Region’s Under 65 Population Present in This Study’s Research Database**

| Region                                                                                                                                                                                                                                                      | 2018 US Population Under Age 65 <sup>1</sup> | Health Plan Members from Which The Study Cohort Was Drawn (Enrolled on March 1, 2020) <sup>a</sup> | Est. % of Region’s Under 65 Population in Database <sup>b</sup> |
|-------------------------------------------------------------------------------------------------------------------------------------------------------------------------------------------------------------------------------------------------------------|----------------------------------------------|----------------------------------------------------------------------------------------------------|-----------------------------------------------------------------|
| East North Central                                                                                                                                                                                                                                          | 38,215,000                                   | 7,413,126                                                                                          | 19.40%                                                          |
| East South Central                                                                                                                                                                                                                                          | 15,480,900                                   | 3,735,488                                                                                          | 24.13%                                                          |
| Middle Atlantic                                                                                                                                                                                                                                             | 33,364,800                                   | 6,421,859                                                                                          | 19.25%                                                          |
| Mountain                                                                                                                                                                                                                                                    | 20,216,900                                   | 2,766,328                                                                                          | 13.68%                                                          |
| New England                                                                                                                                                                                                                                                 | 11,857,300                                   | 2,338,916                                                                                          | 19.73%                                                          |
| Pacific                                                                                                                                                                                                                                                     | 44,496,400                                   | 4,009,926                                                                                          | 9.01%                                                           |
| South Atlantic                                                                                                                                                                                                                                              | 52,376,700                                   | 10,366,306                                                                                         | 19.79%                                                          |
| West North Central                                                                                                                                                                                                                                          | 17,385,600                                   | 4,689,088                                                                                          | 26.97%                                                          |
| West South Central                                                                                                                                                                                                                                          | 33,982,900                                   | 7,451,841                                                                                          | 21.93%                                                          |
| <sup>a</sup> This column reflects the 50.4 M cohort enrolled on March 1, 2020 from which the study cohort was drawn. See eFigure1. Persons in the cohort with missing state information or residing in non-state US territories not included in this table. |                                              |                                                                                                    |                                                                 |
| <sup>b</sup> Percentage represents ratio of health plan member count to estimated 2018 US population below age 65.                                                                                                                                          |                                              |                                                                                                    |                                                                 |

<sup>1</sup> Kaiser Family Foundation estimates based on the Census Bureau's American Community Survey, 2008-2018. <https://www.kff.org/other/state-indicator/distribution-by-age>. Accessed October 22,2020.

**eTable 2. COVID-19 Cohort Identification Criteria and Study Member Count In the COVID-19 (and Non-COVID) Related Subgroups During the March-June 2020 Study Period**

**A: COVID-19 Cohort Identification Criteria<sup>a</sup>**

| Code                                                                                                                                                                                                                                                                                                                                                                                                                                                                                                                   | Description of Code                                                                                                                                                                                                                                              |
|------------------------------------------------------------------------------------------------------------------------------------------------------------------------------------------------------------------------------------------------------------------------------------------------------------------------------------------------------------------------------------------------------------------------------------------------------------------------------------------------------------------------|------------------------------------------------------------------------------------------------------------------------------------------------------------------------------------------------------------------------------------------------------------------|
| <b>(1) COVID-19 diagnosis</b>                                                                                                                                                                                                                                                                                                                                                                                                                                                                                          |                                                                                                                                                                                                                                                                  |
| B9729                                                                                                                                                                                                                                                                                                                                                                                                                                                                                                                  | Other coronavirus as the cause of diseases classified elsewhere                                                                                                                                                                                                  |
| U071                                                                                                                                                                                                                                                                                                                                                                                                                                                                                                                   | 2019-nCoV Acute Respiratory Disease                                                                                                                                                                                                                              |
| <b>(2) COVID-19 exposure</b>                                                                                                                                                                                                                                                                                                                                                                                                                                                                                           |                                                                                                                                                                                                                                                                  |
| Z03818                                                                                                                                                                                                                                                                                                                                                                                                                                                                                                                 | Encounter for observation for suspected exposure to other biologic agents ruled out                                                                                                                                                                              |
| Z20828                                                                                                                                                                                                                                                                                                                                                                                                                                                                                                                 | Contact with and exposure to other viral communicable diseases                                                                                                                                                                                                   |
| <b>(3) COVID-19 screening</b>                                                                                                                                                                                                                                                                                                                                                                                                                                                                                          |                                                                                                                                                                                                                                                                  |
| Z1159                                                                                                                                                                                                                                                                                                                                                                                                                                                                                                                  | Encounter for screening for other viral diseases                                                                                                                                                                                                                 |
| <b>(4) COVID-19 testing</b>                                                                                                                                                                                                                                                                                                                                                                                                                                                                                            |                                                                                                                                                                                                                                                                  |
| 0202U                                                                                                                                                                                                                                                                                                                                                                                                                                                                                                                  | NFCT DS 22 TRGT SARS-COV-2                                                                                                                                                                                                                                       |
| 0223U                                                                                                                                                                                                                                                                                                                                                                                                                                                                                                                  | NFCT DS 22 TRGT SARS-COV-2                                                                                                                                                                                                                                       |
| 0224U                                                                                                                                                                                                                                                                                                                                                                                                                                                                                                                  | ANTIBODY SARS-COV-2 TITER(S)                                                                                                                                                                                                                                     |
| 0225U                                                                                                                                                                                                                                                                                                                                                                                                                                                                                                                  | NFCT DS DNA&RNA 21 SARSCOV2                                                                                                                                                                                                                                      |
| 0226U                                                                                                                                                                                                                                                                                                                                                                                                                                                                                                                  | SVNT SARSCOV2 ELISA PLSM SRM                                                                                                                                                                                                                                     |
| 86328                                                                                                                                                                                                                                                                                                                                                                                                                                                                                                                  | SEVERE ACUTE RESPIRATORY SYNDROME CORONAVIRUS 2 (SARS-COV-2) (CORONAVIRUS DISEASE [COVID-19])                                                                                                                                                                    |
| 86769                                                                                                                                                                                                                                                                                                                                                                                                                                                                                                                  | ANTIBODY; SEVERE ACUTE RESPIRATORY SYNDROME CORONAVIRUS 2 (SARS-COV-2) (CORONAVIRUS DISEASE [COVID-19]) (FOR SEVERE ACUTE RESPIRATORY SYNDROME CORONAVIRUS 2 [SARS-COV-2] [CORONAVIRUS DISEASE {COVID-19}] ANTIBODY TESTING USING SINGLE STEP METHOD, USE 86328) |
| 87635                                                                                                                                                                                                                                                                                                                                                                                                                                                                                                                  | SARS-COV-2 COVID-19 AMP PRB                                                                                                                                                                                                                                      |
| C9803                                                                                                                                                                                                                                                                                                                                                                                                                                                                                                                  | HOSPITAL OUTPATIENT CLINIC VISIT SPECIMEN COLLECTION FOR SEVERE ACUTE RESPIRATORY SYNDROME CORONAVIRUS 2 (SARS-COV-2) (CORONAVIRUS DISEASE [COVID-19]), ANY SPECIMEN SOURCE                                                                                      |
| G2023                                                                                                                                                                                                                                                                                                                                                                                                                                                                                                                  | SPECIMEN COLLECTION FOR SEVERE ACUTE RESPIRATORY SYNDROME CORONAVIRUS 2 (SARS-COV-2) (CORONAVIRUS DISEASE [COVID-19]), ANY SPECIMEN SOURCE                                                                                                                       |
| G2024                                                                                                                                                                                                                                                                                                                                                                                                                                                                                                                  | SPECIMEN COLLECTION FOR SEVERE ACUTE RESPIRATORY SYNDROME CORONAVIRUS 2 (SARS-COV-2) (CORONAVIRUS DISEASE [COVID-19]), FROM AN INDIVIDUAL IN A SKILLED NURSING FACILITY OR BY A LABORATORY ON BEHALF OF A HOME HEALTH AGENCY, ANY SPECIMEN SOURCE                |
| U0001                                                                                                                                                                                                                                                                                                                                                                                                                                                                                                                  | CDC 2019 NOVEL CORONAVIRUS (2019-NCOV) REAL-TIME RT-PCR DIAGNOSTIC PANEL                                                                                                                                                                                         |
| U0002                                                                                                                                                                                                                                                                                                                                                                                                                                                                                                                  | TO BE USED TO BILL FOR NON-CDC LABORATORY TESTS FOR SARS-COV-2/2019-NCOV (COVID-19)                                                                                                                                                                              |
| U0003                                                                                                                                                                                                                                                                                                                                                                                                                                                                                                                  | INFECTIOUS AGENT DETECTION BY NUCLEIC ACID (DNA OR RNA); SEVERE ACUTE RESPIRATORY SYNDROME CORONAVIRUS 2 (SARS-COV-2) (CORONAVIRUS DISEASE [COVID-19]), AMPLIFIED PROBE TECHNIQUE, MAKING USE OF HIGH THROUGHPUT TECHNOLOGIES AS DESCRIBED BY CMS-2020-01-R.     |
| U0004                                                                                                                                                                                                                                                                                                                                                                                                                                                                                                                  | 2019-NCOV CORONAVIRUS, SARS-COV-2/2019-NCOV (COVID-19), ANY TECHNIQUE, MULTIPLE TYPES OR SUBTYPES (INCLUDES ALL TARGETS), NON-CDC, MAKING USE OF HIGH THROUGHPUT TECHNOLOGIES AS DESCRIBED BY CMS-2020-01-R.                                                     |
| <p><sup>a</sup> The criteria for designation into the COVID-19 subgroup of the study cohort was having 1+ code within any of the above criteria: (1) diagnosis or (2) exposure or (3) screening or (4) testing. Lists of codes used for each criterion are provided in this table.</p> <p>COVID-19: Coronavirus Disease 2019, CPT: Current Procedural Terminology, HCPC: Healthcare Common Procedure Coding, ICD-10-CM: International Classification of Diseases, 10<sup>th</sup> Revision, Clinical Modification.</p> |                                                                                                                                                                                                                                                                  |

**B: Study Member Count In the COVID-19 (and non-COVID) Related Subgroups During the March – June 2020 Study Period (For Cohort Members with 1+ In-Scope Visit)**

| <b>Subgroup Designation</b>                                                                          | <b>COVID-19 Category<sup>a</sup></b> | <b>COVID-19-Related Criteria</b> | <b>Study Members</b> | <b>Study Members Hospitalized</b> | <b>Study Members Not Hospitalized</b> |
|------------------------------------------------------------------------------------------------------|--------------------------------------|----------------------------------|----------------------|-----------------------------------|---------------------------------------|
| <b>Four COVID-19 Related Categories Considered in-Scope<sup>a</sup></b>                              | 1                                    | Diagnosis                        | 103,606              | 7,069                             | 96,537                                |
|                                                                                                      | 2                                    | Exposure                         | 842,042              | 26,587                            | 815,455                               |
|                                                                                                      | 3                                    | Screening                        | 148,864              | 9,705                             | 139,159                               |
|                                                                                                      | 4                                    | Testing                          | 376,209              | 28,409                            | 347,800                               |
| <b>Total COVID-19 Related Subgroup Based on 1+ In-Scope Codes</b>                                    |                                      |                                  | 1,470,721            | 71,770                            | 1,398,951                             |
| <b>Not in COVID-19 Related Subgroup</b>                                                              |                                      |                                  | 13,966,497           |                                   |                                       |
| <sup>a</sup> See COVID-19 identification criteria listed in 4 separate categories in eTable2-A above |                                      |                                  |                      |                                   |                                       |

**eTable 3: A Comprehensive List of Telehealth-Eligible Services and Associated Codes<sup>a</sup>**

| Type of Service                                                                                                                                                                                                                                                                                                                                                                                                  | CPT and HCPCS Codes associated with Type of Service                                                                                                                                                                                                                                                                                                                                                                                                                                                                                                                                                                                                                                                                                                                                                                                                                                                                                                                                                                                                                                                                                                                                                                                                                                                                                                                                                                                                                                             |
|------------------------------------------------------------------------------------------------------------------------------------------------------------------------------------------------------------------------------------------------------------------------------------------------------------------------------------------------------------------------------------------------------------------|-------------------------------------------------------------------------------------------------------------------------------------------------------------------------------------------------------------------------------------------------------------------------------------------------------------------------------------------------------------------------------------------------------------------------------------------------------------------------------------------------------------------------------------------------------------------------------------------------------------------------------------------------------------------------------------------------------------------------------------------------------------------------------------------------------------------------------------------------------------------------------------------------------------------------------------------------------------------------------------------------------------------------------------------------------------------------------------------------------------------------------------------------------------------------------------------------------------------------------------------------------------------------------------------------------------------------------------------------------------------------------------------------------------------------------------------------------------------------------------------------|
| <b>E &amp; M – office</b>                                                                                                                                                                                                                                                                                                                                                                                        | 99201, 99202, 99203, 99204, 99205, 99211, 99212, 99213, 99214, 99215, 99354, 99355, 99421 <sup>c</sup> , 99422 <sup>c</sup> , 99423 <sup>c</sup> , 99441 <sup>c</sup> , 99442 <sup>c</sup> , 99443 <sup>c</sup> , G2012, G2061 <sup>c</sup> , G2062 <sup>c</sup> , G2063 <sup>c</sup>                                                                                                                                                                                                                                                                                                                                                                                                                                                                                                                                                                                                                                                                                                                                                                                                                                                                                                                                                                                                                                                                                                                                                                                                           |
| <b>E &amp; M – emergency department<sup>b</sup></b>                                                                                                                                                                                                                                                                                                                                                              | 99281, 99282, 99283, 99284, 99285                                                                                                                                                                                                                                                                                                                                                                                                                                                                                                                                                                                                                                                                                                                                                                                                                                                                                                                                                                                                                                                                                                                                                                                                                                                                                                                                                                                                                                                               |
| <b>E &amp; M – hospital<sup>b</sup></b>                                                                                                                                                                                                                                                                                                                                                                          | 99217, 99218, 99219, 99220, 99221, 99222, 99223, 99224, 99225, 99226, 99231, 99232, 99233, 99234, 99235, 99236, 99238, 99239, 99291, 99292, 99356, 99357, 99468, 99469, 99471, 99472, 99475, 99476, 99477, 99478, 99479, 99480, G0508 <sup>c</sup> , G0509 <sup>c</sup>                                                                                                                                                                                                                                                                                                                                                                                                                                                                                                                                                                                                                                                                                                                                                                                                                                                                                                                                                                                                                                                                                                                                                                                                                         |
| <b>Behavioral health</b>                                                                                                                                                                                                                                                                                                                                                                                         | 0362T, 0373T, 90785, 90791, 90792, 90832, 90833, 90834, 90836, 90837, 90838, 90839, 90840, 90845, 90846, 90847, 90853, 90875, 97151, 97152, 97153, 97154, 97155, 97156, 97157, 97158, G0396, G0397, G0410, G0443, G2086, G2087, G2088                                                                                                                                                                                                                                                                                                                                                                                                                                                                                                                                                                                                                                                                                                                                                                                                                                                                                                                                                                                                                                                                                                                                                                                                                                                           |
| <b>Rehabilitation</b>                                                                                                                                                                                                                                                                                                                                                                                            | 97110, 97112, 97116, 97150, 97161, 97162, 97163, 97164, 97165, 97166, 97167, 97168, 97530, 97535, 97542, 97750, 97755, 97760, 97761, S9152                                                                                                                                                                                                                                                                                                                                                                                                                                                                                                                                                                                                                                                                                                                                                                                                                                                                                                                                                                                                                                                                                                                                                                                                                                                                                                                                                      |
| <b>Other</b>                                                                                                                                                                                                                                                                                                                                                                                                     | 77427, 90951, 90952, 90953, 90954, 90955, 90956, 90957, 90958, 90959, 90960, 90961, 90962, 90963, 90964, 90965, 90966, 90967, 90968, 90969, 90970, 92002, 92004, 92012, 92014, 92507, 92508, 92521, 92522, 92523, 92524, 92601, 92602, 92603, 92604, 94002, 94003, 94004, 94005, 94664, 96110, 96112, 96113, 96116, 96121, 96127, 96130, 96131, 96132, 96133, 96136, 96137, 96138, 96139, 96156, 96158, 96159, 96160, 96161, 96164, 96165, 96167, 96168, 96170, 96171, 97802, 97803, 97804, 98966 <sup>c</sup> , 98967 <sup>c</sup> , 98968 <sup>c</sup> , 98970 <sup>c</sup> , 98971 <sup>c</sup> , 98972 <sup>c</sup> , 99091 <sup>c</sup> , 99304, 99305, 99306, 99307, 99308, 99309, 99310, 99315, 99316, 99324, 99325, 99326, 99327, 99328, 99334, 99335, 99336, 99337, 99341, 99342, 99343, 99344, 99345, 99347, 99348, 99349, 99350, 99406, 99407, 99446 <sup>c</sup> , 99447 <sup>c</sup> , 99448 <sup>c</sup> , 99449 <sup>c</sup> , 99451 <sup>c</sup> , 99452 <sup>c</sup> , 99453 <sup>c</sup> , 99454 <sup>c</sup> , 99457 <sup>c</sup> , 99458 <sup>c</sup> , 99473, 99474 <sup>c</sup> , 99483, 99495, 99496, 99497, 99498, G0108, G0109, G0270, G0296, G0406 <sup>c</sup> , G0407 <sup>c</sup> , G0408 <sup>c</sup> , G0420, G0421, G0425 <sup>c</sup> , G0426 <sup>c</sup> , G0427 <sup>c</sup> , G0436, G0437, G0438, G0439, G0442, G0444, G0445, G0446, G0447, G0459 <sup>c</sup> , G0506, G0513, G0514, G2010 <sup>c</sup> , G9685, Q3014 <sup>c</sup> , T1014 <sup>c</sup> |
| <sup>a</sup> A list of CPT® and HCPCS codes for telehealth-eligible services by type of service <sup>2</sup><br><sup>b</sup> Type of service was excluded from our study.<br><sup>c</sup> Code does not require a modifier or place of service code if provided via telehealth.<br>CPT: Current Procedural Terminology, E & M: means evaluation and management, HCPCS: Healthcare Common Procedure Coding System |                                                                                                                                                                                                                                                                                                                                                                                                                                                                                                                                                                                                                                                                                                                                                                                                                                                                                                                                                                                                                                                                                                                                                                                                                                                                                                                                                                                                                                                                                                 |

<sup>2</sup> CMS List of telehealth services. <https://www.cms.gov/Medicare/Medicare-General-Information/Telehealth/Telehealth-Codes>. Accessed September 21, 2020

**eTable 4. CMS Designated Codes for Place of Service**

| <b>Place of Service Category</b> | <b>CMS Place of Service Code</b> | <b>CMS Place of Service Name</b>                   |
|----------------------------------|----------------------------------|----------------------------------------------------|
| <b>Inpatient</b>                 | 13                               | Assisted Living Facility                           |
|                                  | 14                               | Group Home                                         |
|                                  | 21                               | Inpatient Hospital                                 |
|                                  | 31                               | Skilled Nursing Facility                           |
|                                  | 32                               | Nursing Facility                                   |
|                                  | 33                               | Custodial Care Facility                            |
|                                  | 51                               | Inpatient Psychiatric Facility                     |
|                                  | 54                               | Intermediate Care Facility                         |
|                                  | 55                               | Residential Substance Abuse Treatment Facility     |
|                                  | 56                               | Psychiatric Residential Treatment Center           |
|                                  | 61                               | Comprehensive Inpatient Rehabilitation Facility    |
| <b>Emergency Department</b>      | 23                               | Emergency Room – Hospital                          |
| <b>Outpatient Facility</b>       | 05                               | Indian Health Service Free-standing Facility       |
|                                  | 06                               | Indian Health Service Provider-based Facility      |
|                                  | 07                               | Tribal 638 Free-standing Facility                  |
|                                  | 08                               | Tribal 638 Provider-based Facility                 |
|                                  | 19                               | Off Campus-Outpatient Hospital                     |
|                                  | 22                               | On Campus-Outpatient Hospital                      |
|                                  | 24                               | Ambulatory Surgical Center                         |
|                                  | 25                               | Birthing Center                                    |
|                                  | 26                               | Military Treatment Facility                        |
|                                  | 52                               | Psychiatric Facility-Partial Hospitalization       |
|                                  | 57                               | Non-residential Substance Abuse Treatment Facility |
|                                  | 58                               | Non-residential Opioid Treatment Facility          |
|                                  | 62                               | Comprehensive Outpatient Rehabilitation Facility   |
|                                  | 65                               | End-Stage Renal Disease Treatment Facility         |
| <b>Office / Clinic</b>           | 11                               | Office                                             |
|                                  | 17                               | Walk-in Retail Health Clinic                       |
|                                  | 18                               | Place of Employment-Worksite                       |
|                                  | 20                               | Urgent Care Facility                               |
|                                  | 49                               | Independent Clinic                                 |
|                                  | 50                               | Federally Qualified Health Center                  |
|                                  | 53                               | Community Mental Health Center                     |
|                                  | 60                               | Mass Immunization Center                           |
|                                  | 71                               | Public Health Clinic                               |
| 72                               | Rural Health Clinic              |                                                    |
| <b>Telehealth</b>                | 02                               | Telehealth                                         |
| <b>Other Ambulatory</b>          | 01                               | Pharmacy                                           |
|                                  | 03                               | School                                             |
|                                  | 04                               | Homeless Shelter                                   |
|                                  | 09                               | Prison/ Correctional Facility                      |
|                                  | 12                               | Home                                               |
|                                  | 15                               | Mobile Unit                                        |
|                                  | 16                               | Temporary Lodging                                  |
|                                  | 34                               | Hospice                                            |

|                                                  |    |                          |
|--------------------------------------------------|----|--------------------------|
|                                                  | 41 | Ambulance - Land         |
|                                                  | 42 | Ambulance – Air or Water |
|                                                  | 81 | Independent Laboratory   |
|                                                  | 99 | Other Place of Service   |
|                                                  | UN | Unknown Place of Service |
| CMS = Centers for Medicare and Medicaid Services |    |                          |

**eTable 5. Approach to Designating Telehealth Services (from Among Telehealth Eligible Services) and Type of Modality**

(See text for further explanation of methodology)

**A: Telehealth Claims by Modality for March-June 2020 Period**

| Communication Modality                     | Claims Count | % of Total |
|--------------------------------------------|--------------|------------|
| Telehealth (e.g., real-time audio / video) | 11,296,298   | 74.42%     |
| Telephone                                  | 1,391,618    | 9.17%      |
| Telephone or internet                      | 2,898        | 0.02%      |
| Online digital visit                       | 359,195      | 2.37%      |
| Asynchronous communication                 | 100,920      | 0.66%      |
| Remote monitoring                          | 39,824       | 0.26%      |
| Not specified (Place of Service 02)        | 1,988,277    | 13.10%     |
| All modalities                             | 15,179,030   | 100.00%    |

**B: Assignment of Telehealth Eligible Service Codes to Specific Type of Virtual Visit Modality**

|                                                                                                                                                                                                                                                                                                                                                                                                                                                                                                                                                                                                                                                                                                                                                                                                                                                                                                                                                                                                                                                                                                                                                                                                                                                                                                                                                                                                                                                                                                                                                                                                                                |
|--------------------------------------------------------------------------------------------------------------------------------------------------------------------------------------------------------------------------------------------------------------------------------------------------------------------------------------------------------------------------------------------------------------------------------------------------------------------------------------------------------------------------------------------------------------------------------------------------------------------------------------------------------------------------------------------------------------------------------------------------------------------------------------------------------------------------------------------------------------------------------------------------------------------------------------------------------------------------------------------------------------------------------------------------------------------------------------------------------------------------------------------------------------------------------------------------------------------------------------------------------------------------------------------------------------------------------------------------------------------------------------------------------------------------------------------------------------------------------------------------------------------------------------------------------------------------------------------------------------------------------|
| <b>Online digital visit</b>                                                                                                                                                                                                                                                                                                                                                                                                                                                                                                                                                                                                                                                                                                                                                                                                                                                                                                                                                                                                                                                                                                                                                                                                                                                                                                                                                                                                                                                                                                                                                                                                    |
| 98970, 98971, 98972, 99421, 99422, 99423, G2061, G2062, G2063                                                                                                                                                                                                                                                                                                                                                                                                                                                                                                                                                                                                                                                                                                                                                                                                                                                                                                                                                                                                                                                                                                                                                                                                                                                                                                                                                                                                                                                                                                                                                                  |
| <b>Remote monitoring</b>                                                                                                                                                                                                                                                                                                                                                                                                                                                                                                                                                                                                                                                                                                                                                                                                                                                                                                                                                                                                                                                                                                                                                                                                                                                                                                                                                                                                                                                                                                                                                                                                       |
| 99091, 99453, 99454, 99457, 99458, 99473, 99474, G2010                                                                                                                                                                                                                                                                                                                                                                                                                                                                                                                                                                                                                                                                                                                                                                                                                                                                                                                                                                                                                                                                                                                                                                                                                                                                                                                                                                                                                                                                                                                                                                         |
| <b>Video supported telehealth</b>                                                                                                                                                                                                                                                                                                                                                                                                                                                                                                                                                                                                                                                                                                                                                                                                                                                                                                                                                                                                                                                                                                                                                                                                                                                                                                                                                                                                                                                                                                                                                                                              |
| G0406, G0407, G0408, G0425, G0426, G0427, G0459, G0508, G0509, Q3014, T1014                                                                                                                                                                                                                                                                                                                                                                                                                                                                                                                                                                                                                                                                                                                                                                                                                                                                                                                                                                                                                                                                                                                                                                                                                                                                                                                                                                                                                                                                                                                                                    |
| <b>Telephone</b>                                                                                                                                                                                                                                                                                                                                                                                                                                                                                                                                                                                                                                                                                                                                                                                                                                                                                                                                                                                                                                                                                                                                                                                                                                                                                                                                                                                                                                                                                                                                                                                                               |
| 98966, 98967, 98968, 99441, 99442, 99443                                                                                                                                                                                                                                                                                                                                                                                                                                                                                                                                                                                                                                                                                                                                                                                                                                                                                                                                                                                                                                                                                                                                                                                                                                                                                                                                                                                                                                                                                                                                                                                       |
| <b>Telephone or internet</b>                                                                                                                                                                                                                                                                                                                                                                                                                                                                                                                                                                                                                                                                                                                                                                                                                                                                                                                                                                                                                                                                                                                                                                                                                                                                                                                                                                                                                                                                                                                                                                                                   |
| 99446, 99447, 99448, 99449, 99451, 99452                                                                                                                                                                                                                                                                                                                                                                                                                                                                                                                                                                                                                                                                                                                                                                                                                                                                                                                                                                                                                                                                                                                                                                                                                                                                                                                                                                                                                                                                                                                                                                                       |
| <b>Not specified (in-person or via-telehealth depending on modifiers or place of service codes)</b>                                                                                                                                                                                                                                                                                                                                                                                                                                                                                                                                                                                                                                                                                                                                                                                                                                                                                                                                                                                                                                                                                                                                                                                                                                                                                                                                                                                                                                                                                                                            |
| 77427, 90785, 90791, 90792, 90832, 90833, 90834, 90836, 90837, 90838, 90839, 90840, 90845, 90846, 90847, 90853, 90875, 90951, 90952, 90953, 90954, 90955, 90956, 90957, 90958, 90959, 90960, 90961, 90962, 90963, 90964, 90965, 90966, 90967, 90968, 90969, 90970, 92002, 92004, 92012, 92014, 92507, 92508, 92521, 92522, 92523, 92524, 92601, 92602, 92603, 92604, 94002, 94003, 94004, 94005, 94664, 96110, 96112, 96113, 96116, 96121, 96127, 96130, 96131, 96132, 96133, 96136, 96137, 96138, 96139, 96156, 96158, 96159, 96160, 96161, 96164, 96165, 96167, 96168, 96170, 96171, 97110, 97112, 97116, 97150, 97151, 97152, 97153, 97154, 97155, 97156, 97157, 97158, 97161, 97162, 97163, 97164, 97165, 97166, 97167, 97168, 97530, 97535, 97542, 97750, 97755, 97760, 97761, 97802, 97803, 97804, 99201, 99202, 99203, 99204, 99205, 99211, 99212, 99213, 99214, 99215, 99217, 99218, 99219, 99220, 99221, 99222, 99223, 99224, 99225, 99226, 99231, 99232, 99233, 99234, 99235, 99236, 99238, 99239, 99281, 99282, 99283, 99284, 99285, 99291, 99292, 99304, 99305, 99306, 99307, 99308, 99309, 99310, 99315, 99316, 99324, 99325, 99326, 99327, 99328, 99334, 99335, 99336, 99337, 99341, 99342, 99343, 99344, 99345, 99347, 99348, 99349, 99350, 99354, 99355, 99356, 99357, 99406, 99407, 99468, 99469, 99471, 99472, 99475, 99476, 99477, 99478, 99479, 99480, 99483, 99495, 99496, 99497, 99498, 0362T, 0373T, G0108, G0109, G0270, G0296, G0396, G0397, G0410, G0420, G0421, G0436, G0437, G0438, G0439, G0442, G0443, G0444, G0445, G0446, G0447, G0506, G0513, G0514, G2012, G2086, G2087, G2088, G9685, S9152 |



**C: Service Modifier and Place of Service Codes Used to Designate Telehealth Service and Modality**

| <b>Code Type</b>        | <b>Code</b> | <b>Definition</b>                                                                                                            | <b>Modality Classification</b> |
|-------------------------|-------------|------------------------------------------------------------------------------------------------------------------------------|--------------------------------|
| <b>Modifier</b>         | GT          | “Via interactive audio and video telecommunications systems.”                                                                | Video-Supported telehealth     |
|                         | GQ          | “Via an asynchronous telecommunications system.”                                                                             | Asynchronous Communication     |
|                         | 95          | “Synchronous telemedicine service rendered via a real-time interactive audio and video telecommunications system.”           | Video Supported-Telehealth     |
| <b>Place of Service</b> | 02          | The location where health services and health related services are provided or received, through a telecommunication system. | Telehealth - not specified     |

**eTable 6. Study Designated Specialty Using CMS Provider Specialty Codes**

| <b>Study Designated Specialty</b> | <b>CMS Provider Specialty Code</b> | <b>Specialty Description</b>             |
|-----------------------------------|------------------------------------|------------------------------------------|
| <b>Primary Care</b>               | 1                                  | GENERAL PRACTICE                         |
|                                   | 8                                  | FAMILY PRACTICE                          |
|                                   | 11                                 | INTERNAL MEDICINE                        |
|                                   | 16                                 | OBSTETRICS GYNECOLOGY                    |
|                                   | 37                                 | PEDIATRIC MEDICINE                       |
|                                   | 38                                 | GERIATRIC MEDICINE                       |
| <b>Medical Specialist</b>         | 3                                  | ALLERGY / IMMUNOLOGY                     |
|                                   | 6                                  | CARDIOLOGY                               |
|                                   | 7                                  | DERMATOLOGY                              |
|                                   | 10                                 | GASTROENTEROLOGY                         |
|                                   | 13                                 | NEUROLOGY                                |
|                                   | 21                                 | CARDIAC ELECTROPHYSIOLOGY                |
|                                   | 29                                 | PULMONARY DISEASE                        |
|                                   | 39                                 | NEPHROLOGY                               |
|                                   | 44                                 | INFECTIOUS DISEASES                      |
|                                   | 46                                 | ENDOCRINOLOGY                            |
|                                   | 66                                 | RHEUMATOLOGY                             |
|                                   | 81                                 | CRITICAL CARE (INTENSIVISTS)             |
|                                   | 82                                 | HEMATOLOGY                               |
|                                   | 83                                 | HEMATOLOGY / ONCOLOGY                    |
|                                   | 84                                 | PREVENTIVE MEDICINE                      |
|                                   | 90                                 | MEDICAL ONCOLOGY                         |
|                                   | C0                                 | SLEEP MEDICINE                           |
| <b>Surgical Specialist</b>        | 2                                  | GENERAL SURGERY                          |
|                                   | 4                                  | OTOLARYNGOLOGY                           |
|                                   | 14                                 | NEUROSURGERY                             |
|                                   | 18                                 | OPHTHALMOLOGY                            |
|                                   | 19                                 | ORAL SURGERY (DENTISTS ONLY)             |
|                                   | 20                                 | ORTHOPEDIC SURGERY                       |
|                                   | 23                                 | SPORTS MEDICINE                          |
|                                   | 24                                 | PLASTIC AND RECONSTRUCTIVE SURGERY       |
|                                   | 28                                 | COLORECTAL SURGERY (FORMERLY PROCTOLOGY) |
|                                   | 33                                 | THORACIC SURGERY                         |
|                                   | 34                                 | UROLOGY                                  |
|                                   | 40                                 | HAND SURGERY                             |
|                                   | 76                                 | PERIPHERAL VASCULAR DISEASE              |
|                                   | 77                                 | VASCULAR SURGERY                         |
|                                   | 78                                 | CARDIAC SURGERY                          |
|                                   | 85                                 | MAXILLOFACIAL SURGERY                    |
|                                   | 91                                 | SURGICAL ONCOLOGY                        |
| 98                                | GYNECOLOGICAL / ONCOLOGY           |                                          |
| <b>Behavioral Health</b>          | 26                                 | PSYCHIATRY                               |
|                                   | 27                                 | GERIATRIC PSYCHIATRY                     |
|                                   | 62                                 | INDEPENDENT BILLING PSYCHOLOGIST         |

|                                                 |    |                                                |
|-------------------------------------------------|----|------------------------------------------------|
|                                                 | 68 | CLINICAL PSYCHOLOGIST                          |
|                                                 | 79 | ADDICTION MEDICINE                             |
|                                                 | 86 | NEUROPSYCHIATRY                                |
| <b>Rehabilitation</b>                           | 12 | OSTEOPATHIC MANIPULATIVE THERAPY               |
|                                                 | 15 | SPEECH LANGUAGE PATH. IN PRIV. PRACTICE        |
|                                                 | 25 | PHYSICAL MEDICINE AND REHABILITATION           |
|                                                 | 35 | CHIROPRACTIC                                   |
|                                                 | 65 | INDEPENDENTLY PRACTICING PHYSICAL THERAPIST    |
|                                                 | 67 | INDEPEND. PRACTICING OCCUPATIONAL THERAPIST    |
| <b>Physician Assistant / Nurse Practitioner</b> | 50 | NURSE PRACTITIONER                             |
|                                                 | 89 | CERTIFIED CLINICAL NURSE SPECIALIST            |
|                                                 | 97 | PHYSICIAN ASSISTANT                            |
| <b>Other Physician / Practitioner</b>           | 5  | ANESTHESIOLOGY                                 |
|                                                 | 9  | INTERVENTIONAL PAIN MANAGEMENT                 |
|                                                 | 22 | PATHOLOGY                                      |
|                                                 | 30 | DIAGNOSTIC RADIOLOGY                           |
|                                                 | 32 | ANESTHESIOLOGIST ASSISTANTS                    |
|                                                 | 36 | NUCLEAR MEDICINE                               |
|                                                 | 41 | OPTOMETRY                                      |
|                                                 | 42 | CERTIFIED NURSE MIDWIFE                        |
|                                                 | 43 | CERTIFIED RN ANESTHETIST, ANESTHESIA ASSISTANT |
|                                                 | 48 | PODIATRY                                       |
|                                                 | 55 | INDIVIDUAL CERTIFIED ORTHOTIST                 |
|                                                 | 56 | INDIVIDUAL CERTIFIED PROSTHETIST               |
|                                                 | 57 | INDIVIDUAL CERTIFIED PROSTHETIST-ORTHOTIST     |
|                                                 | 64 | INDEPENDENTLY BILLING AUDIOLOGIST              |
|                                                 | 70 | MULTI SPECIALTY CLINIC OR GROUP PRACTICE       |
|                                                 | 71 | REGISTERED DIETICIAN/NUTRITION PROFESSIONAL    |
|                                                 | 72 | PAIN MANAGEMENT                                |
|                                                 | 80 | LICENSED CLINICAL SOCIAL WORKER                |
|                                                 | 92 | RADIATION ONCOLOGY                             |
|                                                 | 93 | EMERGENCY MEDICINE                             |
|                                                 | 94 | INTERVENTIONAL RADIOLOGY                       |
|                                                 | 96 | OPTICIAN                                       |
|                                                 | 99 | UNKNOWN PHYSICIAN SPECIALTY                    |
|                                                 | B2 | PEDORTHIC PERSONNEL                            |
|                                                 | B5 | OCULARIST                                      |
| <b>Other</b>                                    | 51 | MEDICAL SUPPLY COMP.WITH CERTIFIED ORTHOTIST   |
|                                                 | 52 | MEDICAL SUPPLY COMP. W/CERTIFIED PROSTHETIST   |
|                                                 | 53 | MED SUPPLY CO. W/CERT. PROSTHETIST ORTHOTIST   |
|                                                 | 54 | MEDICAL SUPPLY COMPANY NOT 51, 52, OR 53       |
|                                                 | 58 | MEDICAL SUPPLY COMP. W/REGIST. PHARMACIST      |
|                                                 | 59 | AMBULANCE SERVICE SUPPLIER                     |
|                                                 | 60 | PUBLIC HEALTH OR WELFARE AGENCIES              |
|                                                 | 61 | VOLUNTARY HEALTH OR CHARITABLE AGENCIES        |
|                                                 | 63 | PORTABLE X-RAY SUPPLIER                        |
|                                                 | 69 | INDEPENDENTLY BILLING CLINICAL LABORATORY      |
|                                                 | 73 | MASS IMMUNIZATION ROSTER BILLER                |
|                                                 | 75 | SLIDE PREPARATION FACILITIES                   |

|                 |    |                                              |
|-----------------|----|----------------------------------------------|
|                 | 87 | ALL OTHER SUPPLIERS                          |
|                 | 88 | UNKNOWN SUPPLIER                             |
|                 | A4 | HOME HEALTH AGENCY                           |
|                 | A5 | PHARMACY                                     |
|                 | A6 | MEDICAL SUPPLY COMP. W/RESPIRATORY THERAPIST |
|                 | A7 | DEPARTMENT STORE                             |
|                 | A8 | GROCERY STORE                                |
|                 | B3 | MEDICAL SUPPLY CO W/ PEDORTHIC PERSONNEL     |
|                 | B4 | REHABILITATION AGENCY                        |
|                 | C1 | CENTRALIZED FLU                              |
|                 | IN | INVALID                                      |
| <b>Facility</b> | 17 | HOSPICE AND PALLIATIVE CARE                  |
|                 | 31 | INTENSIVE CARDIAC REHABILITATION (ICR)       |
|                 | 45 | MAMMOGRAPHY SCREENING CENTER                 |
|                 | 47 | INDEPENDENT DIAGNOSTIC TESTING FACILITY      |
|                 | 49 | AMBULATORY SURGICAL CENTER                   |
|                 | 74 | RADIATION THERAPY CENTER                     |
|                 | A0 | HOSPITAL                                     |
|                 | A1 | SKILLED NURSING FACILITY                     |
|                 | A2 | INTERMEDIATE CARE NURSING FACILITY           |
|                 | A3 | NURSING FACILITY, OTHER                      |

**eTable 7. Comparison of Age and Chronic Condition Counts for Members with 1+ Telehealth vs In-Person Only Visits in 2020: Broken Down by COVID-19 Related Sub-Group Designation (Referent to Text Table 4<sup>a</sup>)**

|                                        | Not in COVID-19 Related Sub-Group <sup>b</sup> |                                |                   |               |                          | In COVID-19 Related Sub-Group <sup>b</sup> |                                |                   |               |                          |
|----------------------------------------|------------------------------------------------|--------------------------------|-------------------|---------------|--------------------------|--------------------------------------------|--------------------------------|-------------------|---------------|--------------------------|
|                                        | Person Count for In-Person Visit Only          | Person Count for 1+ Telehealth | In-person Only, % | Telehealth, % | Un-adj. RRR <sup>c</sup> | Person Count for In-Person Visit Only      | Person Count for 1+ Telehealth | In-person Only, % | Telehealth, % | Un-adj. RRR <sup>c</sup> |
| <b>Total</b>                           | 9,591,554                                      | 4,374,943                      | 100.0             | 100.0         | 1.00                     | 868,249                                    | 602,472                        | 100.0             | 100.0         | 1.00                     |
| <b>Age</b>                             |                                                |                                |                   |               |                          |                                            |                                |                   |               |                          |
| 0 to 5                                 | 584,043                                        | 130,774                        | 6.09              | 2.99          | 0.49                     | 19,704                                     | 10,118                         | 2.27              | 1.68          | 0.74                     |
| 6 to 17                                | 1,226,041                                      | 457,350                        | 12.78             | 10.45         | 0.82                     | 49,092                                     | 26,645                         | 5.65              | 4.42          | 0.78                     |
| 18 to 34                               | 1,958,542                                      | 936,927                        | 20.42             | 21.42         | 1.05                     | 255,008                                    | 146,219                        | 29.37             | 24.27         | 0.83                     |
| 35 to 49                               | 2,266,217                                      | 1,173,574                      | 23.63             | 26.82         | 1.14                     | 241,772                                    | 179,885                        | 27.85             | 29.86         | 1.07                     |
| 50 to 64                               | 3,240,774                                      | 1,510,429                      | 33.79             | 34.52         | 1.02                     | 278,844                                    | 217,414                        | 32.12             | 36.09         | 1.12                     |
| 65+                                    | 315,934                                        | 165,889                        | 3.29              | 3.79          | 1.15                     | 23,829                                     | 22,191                         | 2.74              | 3.68          | 1.34                     |
| <b>Chronic Condition Count in 2019</b> |                                                |                                |                   |               |                          |                                            |                                |                   |               |                          |
| 0                                      | 3,779,992                                      | 1,038,702                      | 39.41             | 23.74         | 0.60                     | 381,361                                    | 165,957                        | 43.92             | 27.55         | 0.63                     |
| 1                                      | 2,894,288                                      | 1,315,993                      | 30.18             | 30.08         | 1.00                     | 239,340                                    | 161,819                        | 27.57             | 26.86         | 0.97                     |
| 2                                      | 1,614,463                                      | 948,159                        | 16.83             | 21.67         | 1.29                     | 131,186                                    | 117,063                        | 15.11             | 19.43         | 1.29                     |
| 3+                                     | 1,302,811                                      | 1,072,089                      | 13.58             | 24.51         | 1.80                     | 116,362                                    | 157,633                        | 13.40             | 26.16         | 1.95                     |

Abbreviation: RRR, relative risk ratio.

<sup>a</sup> See text Table 4. The above table present information on the case-mix of those persons in the last four columns in that table.

<sup>b</sup> 1+ COVID-19 related diagnosis codes reported for each person from COVID-19 related sub-group. Refer to eTable 2 for more information on logic to identify persons with potential or actual COVID-19 Dx during 2020 study period. These includes people tested and/or treated and/or diagnosed with COVID-19.

<sup>c</sup> These ratios reflect the telehealth users' proportion in each row divided by the non-telehealth users' proportion. For example, the bottom left relative risk ratio of 1.80 indicates that for the non-COVID group, a far higher proportion of telehealth users have 3+ chronic conditions relative to the in-person only members i.e., (24.51 ÷ 13.58). The 1.95 ratio in the same row for the COVID-19 suspect group indicates a very similar trend for this group as well.

### eFigure1: Sample Selection and Subgroup Identification Diagram

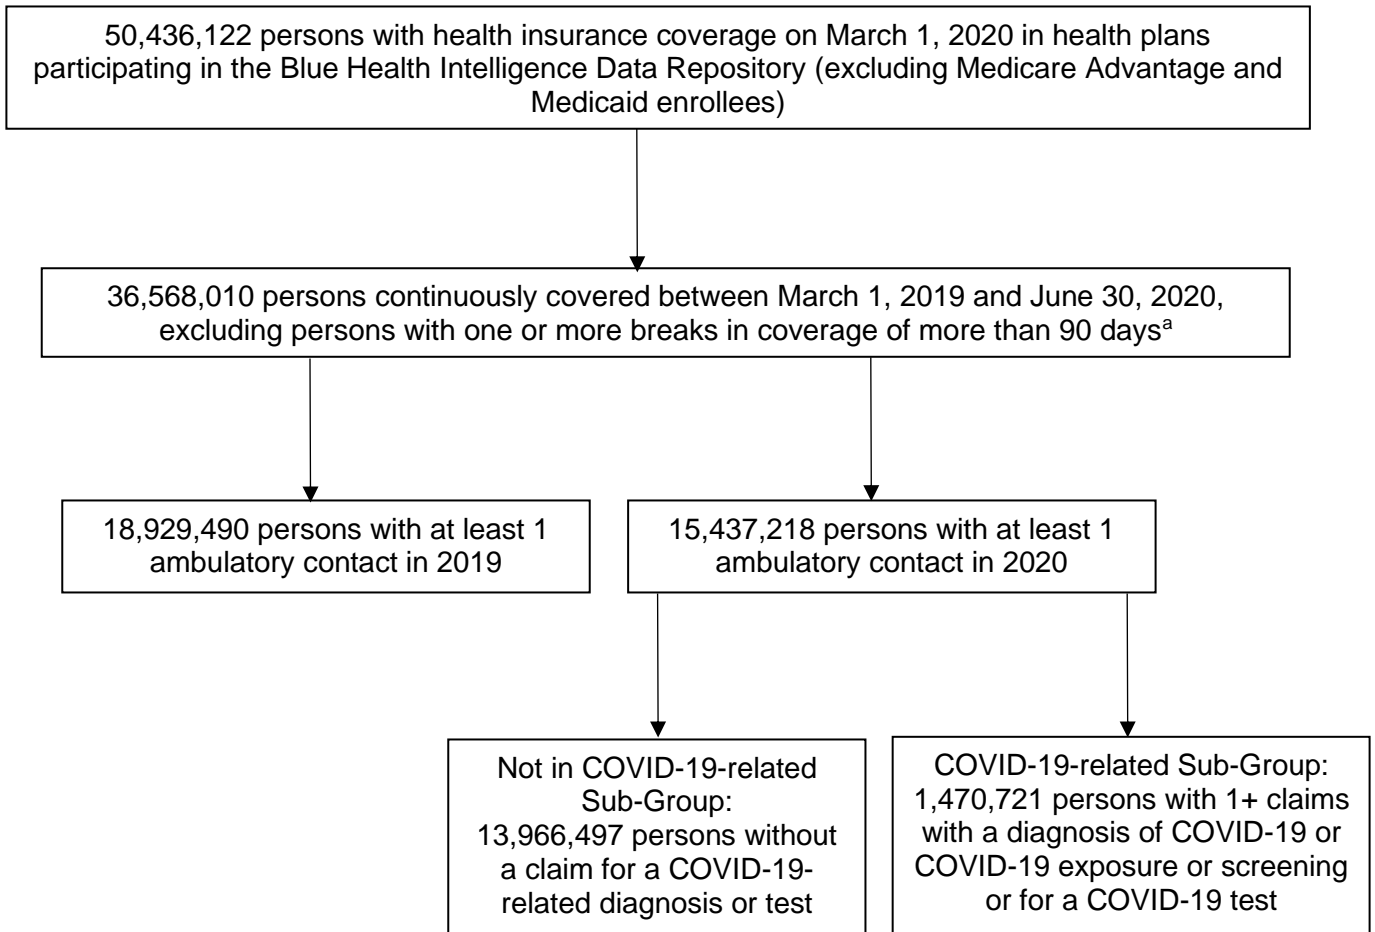

Notes for eFigure 1: Ambulatory contacts are encounters for a set of CPT® and HCPCS codes that in 2020 are eligible for payment on a remote, telehealth basis. See eTable 1 for a listing of codes. Inpatient and hospital emergency department places of service are excluded from the definition, as are service codes that are explicitly defined as inpatient or emergency services. A contact or encounter is defined as a unique combination of member, rendering physician, date of service, and place of service.

Diagnosis codes and service codes for defining the COVID-19-related cohort are in eTable 3. Any claim diagnosis, primary or secondary, on any type of claim, will qualify a person for this cohort, if provided during the 2020 study period; similarly, any claim for a lab test of specimen collection service explicitly defined for COVID-19 will qualify a person for the COVID-19-related cohort.

<sup>a</sup> During this 16-month study period, we allowed up to 90 days for a person to disenroll and re-enroll to account for coverage changes during period. Only 1.2% of cohort had any gap in coverage and of these, the majority of those with a gap (67%) had a gap of one month or less.

**eFigure 2. Ratio of 2020 to 2019 Ambulatory (AMB) Clinical Encounters by Week, March Through June**

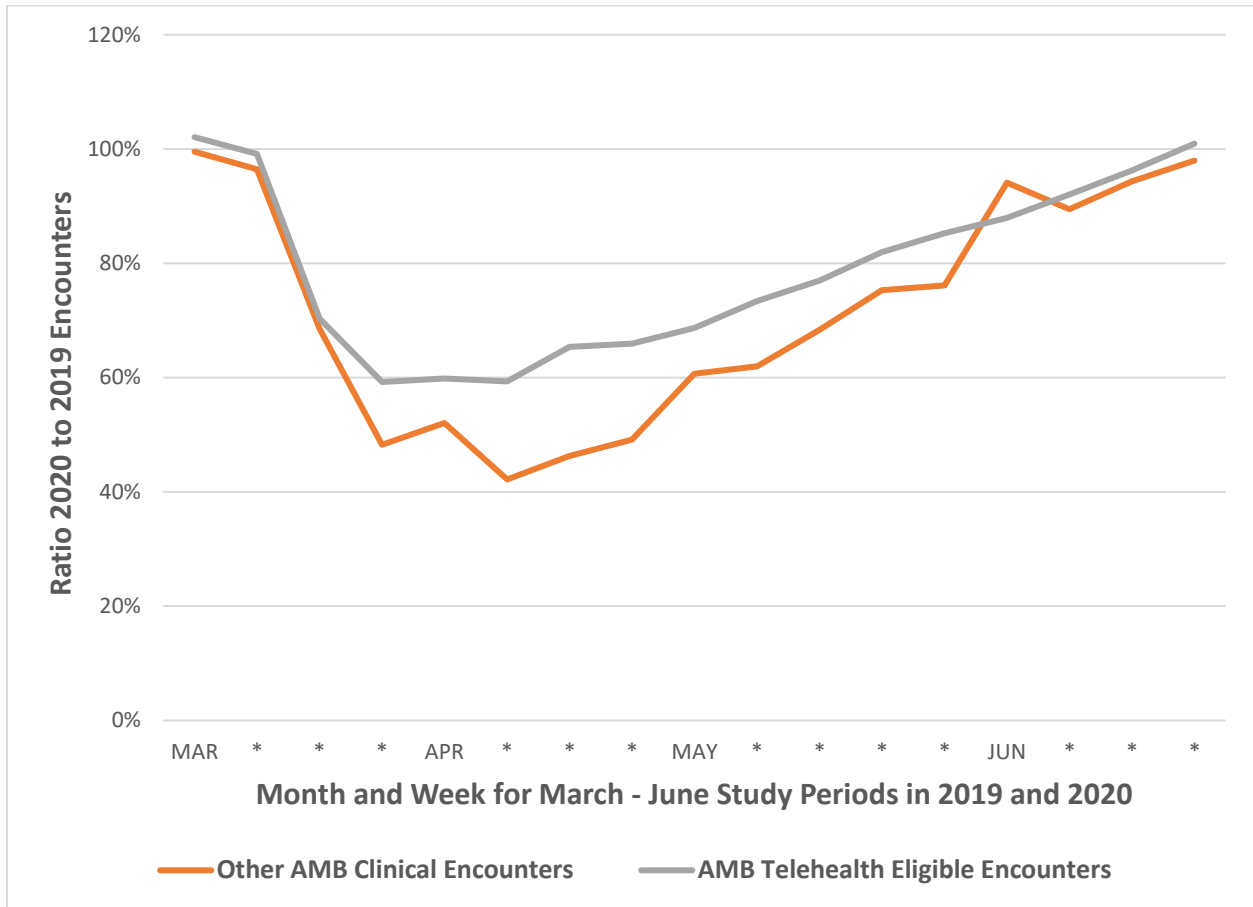

Notes for eFigure 2: The first graph distinguished between “telehealth eligible services” (our list of 264 codes) and all other services provided on an ambulatory basis, except for lab tests and ED visits. Together these two categories correspond to almost all ambulatory care that requires a clinical encounter.

By the second week of April 2020, Other ambulatory (AMB) encounters (orange line) had decreased to only 42% of 2019 levels. In contrast, telehealth eligible services (grey line) were less severely impacted and decreased to 59% of 2019 Levels. By the end of June both categories have steadily climbed back almost to 2019 levels.

The graphs use adjusted encounter counts to account for claim lag using standard actuarial methods.

**eFigure 3. Telehealth-eligible Ambulatory (AMB) Encounters per 1000 Enrollees by Week, March-June 2019 and 2020**

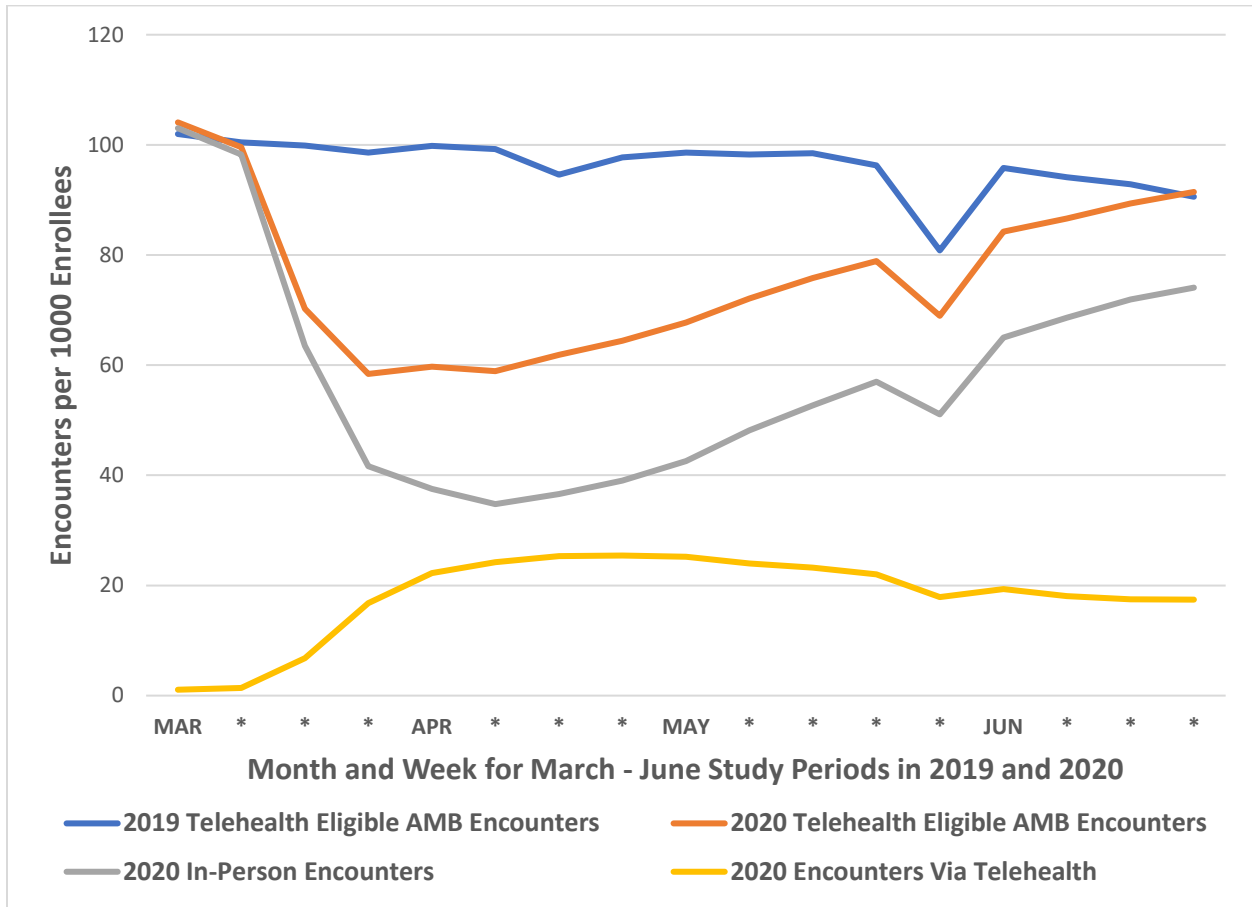

Notes for eFigure 3: The graphs are based on encounters per 1000 enrollees and explain a disparity in impact. This graph focuses exclusively on “telehealth eligible services” and distinguishes between those provided on an “in-person” basis and those provided “via telehealth”.

In-person encounters in 2020 were also severely impacted and dropped to a low of 38.2 encounters per 1000, but this drop was partially offset by a sharp increase in telehealth reaching a peak of 25.4 telehealth encounters per 1000 in the 4<sup>th</sup> week of April before trending down to a rate of 17.4 per 1000 at the end of June. In effect, telehealth played a critical role in helping to ensure continuity and availability of care at the peak of the crisis in the spring of 2020.

The graphs use adjusted encounter counts to account for claim lag using standard actuarial methods.



## eFigure 4. Adjusted Risk Ratios (RRRs) Associated With Telehealth vs. In-Person Ambulatory Visits During 2020 COVID-19 Period

Note that panels A, B, C, and D below represent expanded versions (including confidence intervals) of the graphs that appear in Figure 1 of the main text. The other RRR charts below do not appear in the text.

### RRRs for Encounter-level Model (Based on 46,453,007 Encounters)

A)

| Characteristic | RRR (95% CI)        |
|----------------|---------------------|
| 5 (high)       | 1.335 (1.333,1.337) |
| 4              | 1.152 (1.150,1.154) |
| 3              | 1.038 (1.036,1.040) |
| 2 (low)        | 0.989 (0.988,0.991) |

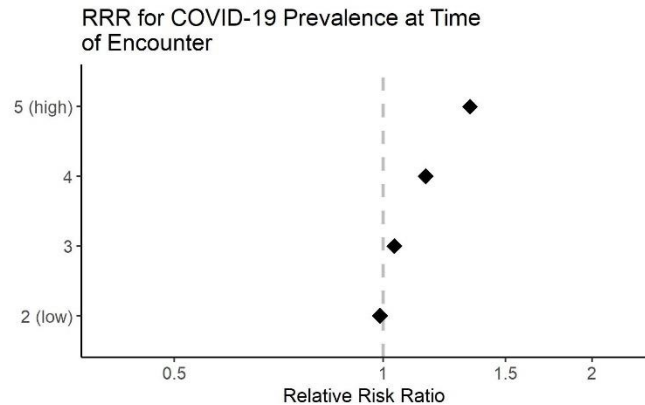

RRR of telehealth contact at encounter level as function of COVID-19 prevalence during week. Area's COVID-19 rates ranked by national quintile. Reference is 1st (lowest) quintile.

B)

| Characteristic      | RRR (95% CI)        |
|---------------------|---------------------|
| Eye                 | 0.331 (0.329,0.334) |
| Pregnancy           | 0.418 (0.413,0.423) |
| Injury              | 0.452 (0.449,0.455) |
| Neoplasms           | 0.526 (0.523,0.529) |
| Ear                 | 0.552 (0.549,0.556) |
| Musculoskeletal     | 0.665 (0.663,0.667) |
| Skin                | 0.676 (0.674,0.679) |
| Health status       | 0.831 (0.829,0.834) |
| Genitourinary       | 0.833 (0.830,0.836) |
| Blood and immune    | 0.861 (0.854,0.868) |
| Respiratory         | 0.898 (0.896,0.901) |
| Infectious          | 0.949 (0.944,0.954) |
| COVID-19-related    | 0.977 (0.972,0.981) |
| Circulatory         | 1.020 (1.017,1.023) |
| Endocrine           | 1.057 (1.054,1.060) |
| Congenital          | 1.122 (1.110,1.134) |
| Digestive           | 1.217 (1.213,1.221) |
| Nervous system      | 1.281 (1.277,1.285) |
| Behavioral disorder | 1.631 (1.627,1.636) |

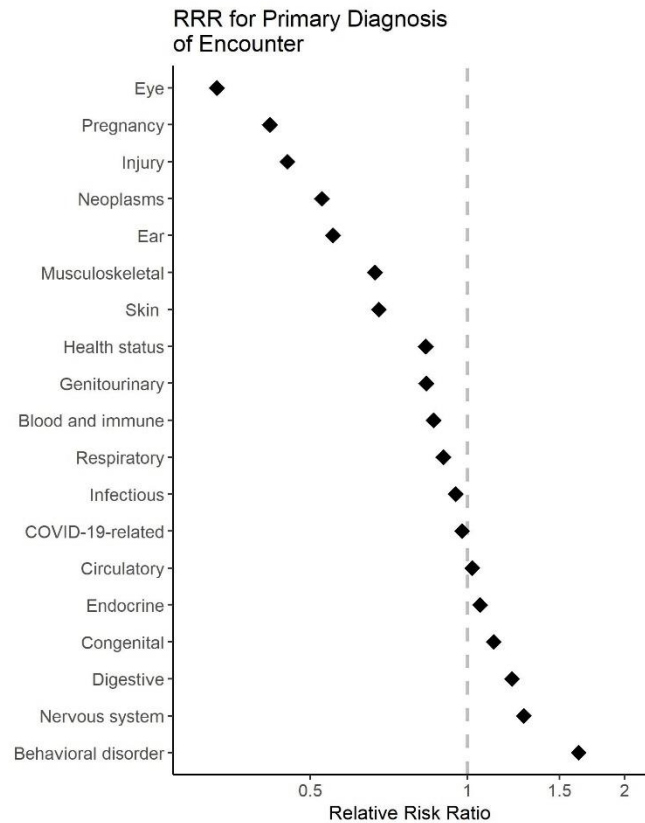

RRR of telehealth contact at encounter level as function of primary problem. Reference is ICD chapter for signs and symptoms.

**RRRs for Person-level Model (15,437,217 Members with 1+ contacts in this analysis)**

C)

| Characteristic | RRR (95% CI)        |
|----------------|---------------------|
| 3 or more      | 2.001 (1.996,2.006) |
| 2              | 1.664 (1.660,1.667) |
| 1              | 1.412 (1.409,1.415) |

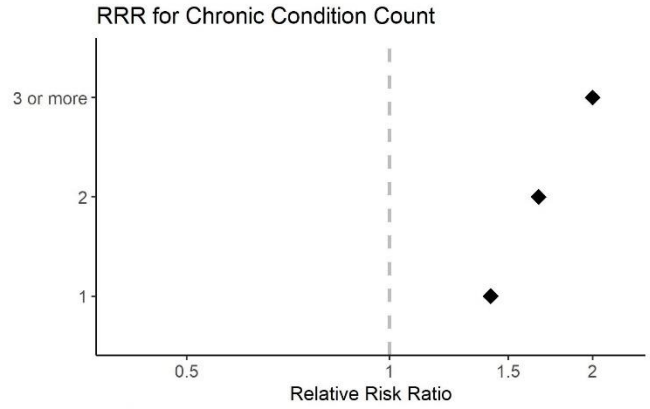

RRR of person with ambulatory services having 1+ telehealth visit as a function of patient's chronic condition count. Reference count is 0.

D)

| Characteristic        | RRR (95% CI)        |
|-----------------------|---------------------|
| Noncore Counties      | 0.629 (0.627,0.632) |
| Micropolitan Counties | 0.699 (0.697,0.701) |
| Small Metro           | 0.743 (0.741,0.745) |
| Medium Metro          | 0.826 (0.824,0.828) |
| Large Fringe Metro    | 0.952 (0.949,0.954) |

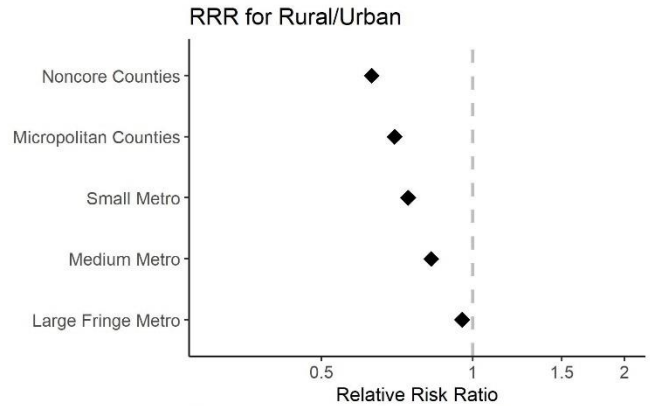

RRR of person with ambulatory services having 1+ telehealth visit as a function of the type of Federal Metropolitan Statistical Area designation of patient's home zip code. Reference is Large Central Metro.

E)

| Characteristic | RRR (95% CI)        |
|----------------|---------------------|
| 65+            | 0.850 (0.847,0.853) |
| 50-64          | 0.878 (0.877,0.880) |
| 18-34          | 1.003 (1.001,1.005) |
| 6-17           | 0.884 (0.882,0.887) |
| 0-5            | 0.659 (0.656,0.662) |

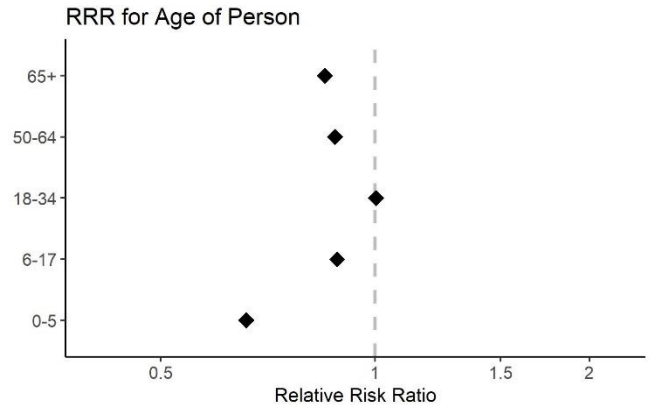

RRR of person with ambulatory services having 1+ telehealth visit as a function of age. Reference is age 35-49.

F)

| Characteristic | RRR (95% CI)        |
|----------------|---------------------|
| Female         | 1.093 (1.091,1.095) |

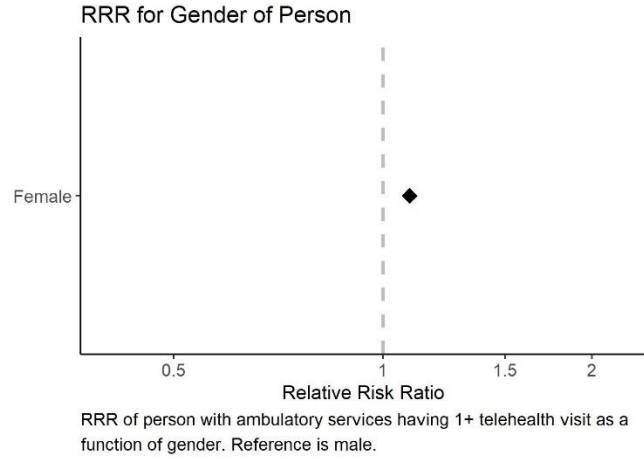

G)

| Characteristic  | RRR (95% CI)        |
|-----------------|---------------------|
| HMO             | 1.181 (1.177,1.184) |
| High Deductible | 0.870 (0.869,0.872) |

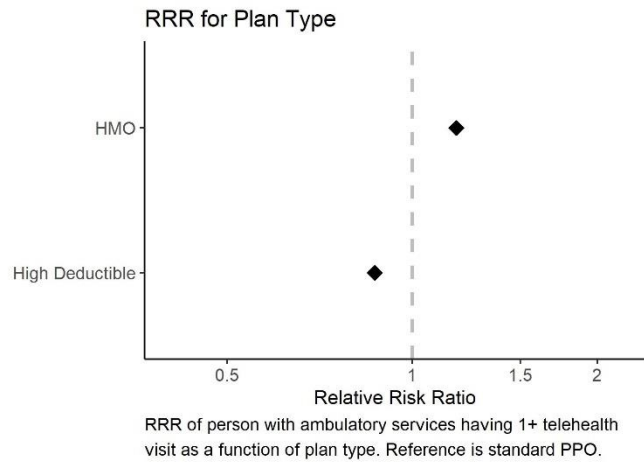

H)

| Characteristic | RRR (95% CI)        |
|----------------|---------------------|
| 4              | 0.940 (0.938,0.942) |
| 3              | 0.922 (0.920,0.924) |
| 2              | 0.940 (0.938,0.941) |

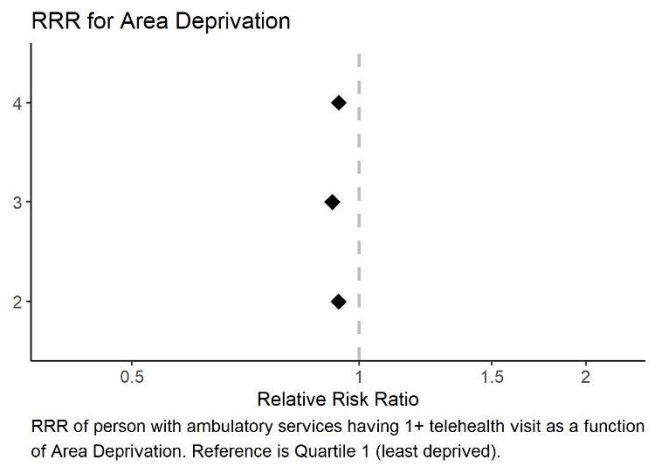

I)

| Characteristic | RRR (95% CI)        |
|----------------|---------------------|
| West           | 0.958 (0.955,0.961) |
| Midwest        | 0.847 (0.845,0.849) |
| South          | 0.840 (0.838,0.842) |

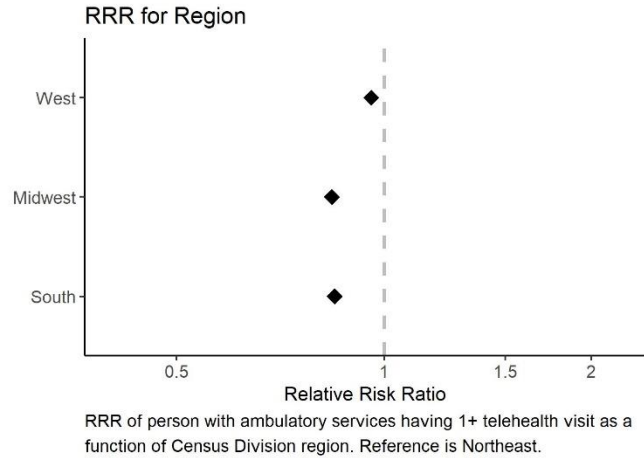

J)

| Characteristic | RRR (95% CI)        |
|----------------|---------------------|
| Hot Spot       | 1.225 (1.222,1.228) |

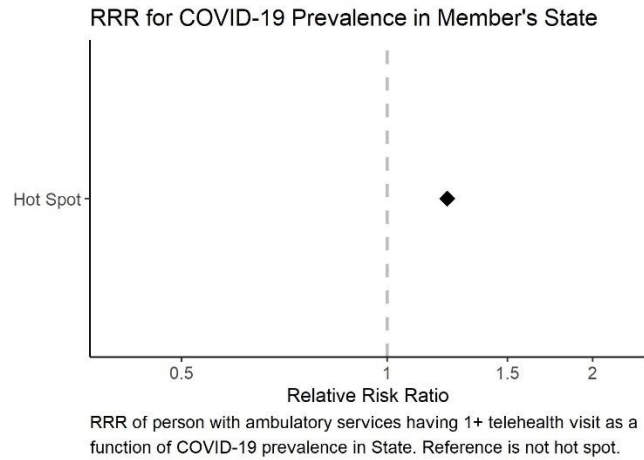

The Relative Risk Ratios (RRR) reflect the odds of a telehealth contact, relative to in-person. The sample included 15,427,217 persons in the continuously insured cohort with 1+ telehealth eligible ambulatory visit during the four-month March-June 2020 study period. These individuals had 46,453,007 in-scope encounters. All risk ratios are adjusted for age, gender, plan type, chronic condition count, morbidity categories, region, urban/ rural, Area Deprivation Index, COVID-19 prevalence during week (for encounter) or “hot spot” (for person level), and type of service. The encounter-level analyses (A and B) are also adjusted for provider specialty and new patient and new condition combinations for that contact. RRR values are plotted on log scales.
